# Supplementary material for: Fluoride-bridged dinuclear dysprosium complex showing single-molecule magnetic behavior: supramolecular approach to isolate magnetic molecules
Source: Royal Society of Chemistry journal article supplement (doi:10.1039/d2ra04119g), 2022-01-01
Supplement: d2ra04119g1.pdf [file d2ra04119g1.pdf]

*Electronic supplementary information for*

# Fluoride-Bridged Dinuclear Dysprosium Complex Showing Single Molecule Magnetic Behavior: Supramolecular Approach to Isolate Magnetic Molecules

Dong-fang Wu, Kiyonori Takahashi,\* Masaru Fujibayashi, Naoto Tsuchiya, Goulven Cosquer,  
Rui-Kang Huang, Chen Xue, Sadafumi Nishihara, Takayoshi Nakamura\*

## Table of Contents

**§1. Single crystal X-ray analysis**

**§2. X-ray photoelectron spectroscopy**

**§3. Scanning electron microscopy (SEM) and energy dispersive X-ray spectroscopy (EDS)**

**§4. Thermogravimetric Analyses (TGA)**

**§5. Infrared Spectroscopy**

**§6. Magnetic Properties**

**S7. References**

## §1. Single crystal X-ray analysis

Table S1. Crystallographic and structure refinements for Crystal 1.

| Crystal                                            | 1                                                |
|----------------------------------------------------|--------------------------------------------------|
| Formula                                            | $C_{160}H_{291}Dy_2Na_{10}O_{163.5}F_2P_2W_{22}$ |
| Molecular weight/g mol <sup>-1</sup>               | 9530.23                                          |
| Crystal system                                     | triclinic                                        |
| space group                                        | <i>P</i>                                         |
| <i>a</i> /Å                                        | 17.5657(6)                                       |
| <i>b</i> /Å                                        | 17.8718(6)                                       |
| <i>c</i> /Å                                        | 24.6678(7)                                       |
| $\alpha$ /deg                                      | 83.624(3)                                        |
| $\beta$ /deg                                       | 78.593(3)                                        |
| $\gamma$ /deg                                      | 66.807(3)                                        |
| <i>V</i> / Å <sup>3</sup>                          | 6972.8(4)                                        |
| <i>Z</i>                                           | 1                                                |
| <i>T</i> / K                                       | 98                                               |
| $\rho_{\text{calc}}$ / g cm <sup>-3</sup>          | 2.108                                            |
| $\mu$ / mm <sup>-1</sup>                           | 20.085                                           |
| <i>F</i> (000)                                     | 4085.0                                           |
| $2\theta$ / °                                      | 5.384 to 145.12                                  |
| Reflections collected                              | 81221                                            |
| Independent reflections                            | 26470                                            |
| Data / restraints / param                          | 26470/517/1508                                   |
| <i>R</i> <sub>int</sub>                            | 0.0440                                           |
| <i>R</i> <sub>1</sub> [ <i>I</i> > 2σ( <i>I</i> )] | 0.0824                                           |
| w <i>R</i> <sub>2</sub> (all data)                 | 0.2706                                           |
| GOF on <i>F</i> <sup>2</sup>                       | 1.035                                            |
| $\Delta\rho_{\text{max/min}}$ /e Å <sup>-3</sup>   | 3.471/-1.704                                     |

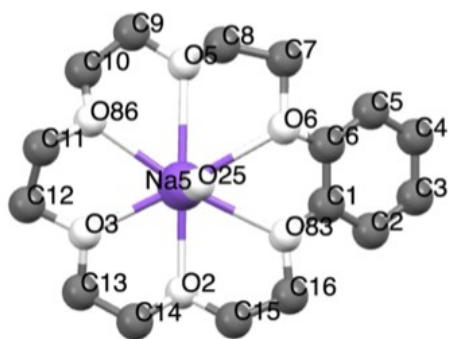

$[(\text{Na}^+)(\text{B18C6})(\text{H}_2\text{O})_{0.5}]$  (A)

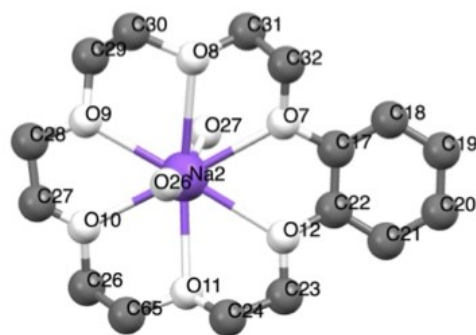

$[(\text{Na}^+)(\text{B18C6})(\text{H}_2\text{O})_{1.5}]$  (B)

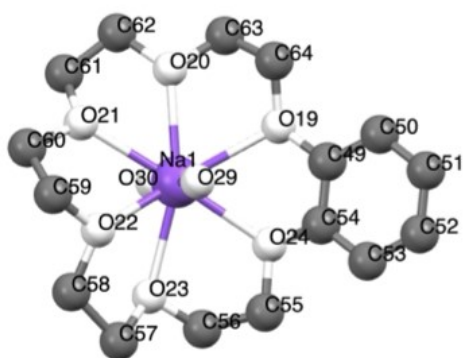

$[(\text{Na}^+)(\text{B18C6})(\text{H}_2\text{O})_{1.75}]$  (C)

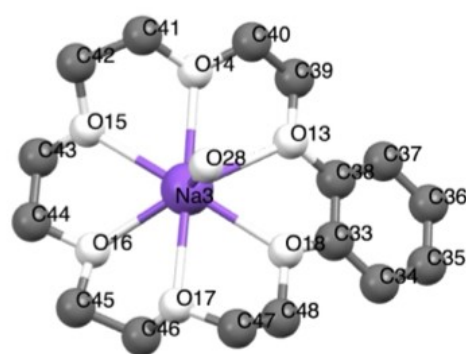

$[(\text{Na}^+)(\text{B18C6})(\text{H}_2\text{O})]$  (D)

**Figure S1.** Crystallographically independent structure of  $(\text{Na})(\text{B18C6})$  units (A, B, C, and D) in crystal **1** at 94 K. Hydrogen atoms are omitted for clarity. Gray, white and purple atoms correspond to carbon, oxygen and sodium, respectively.

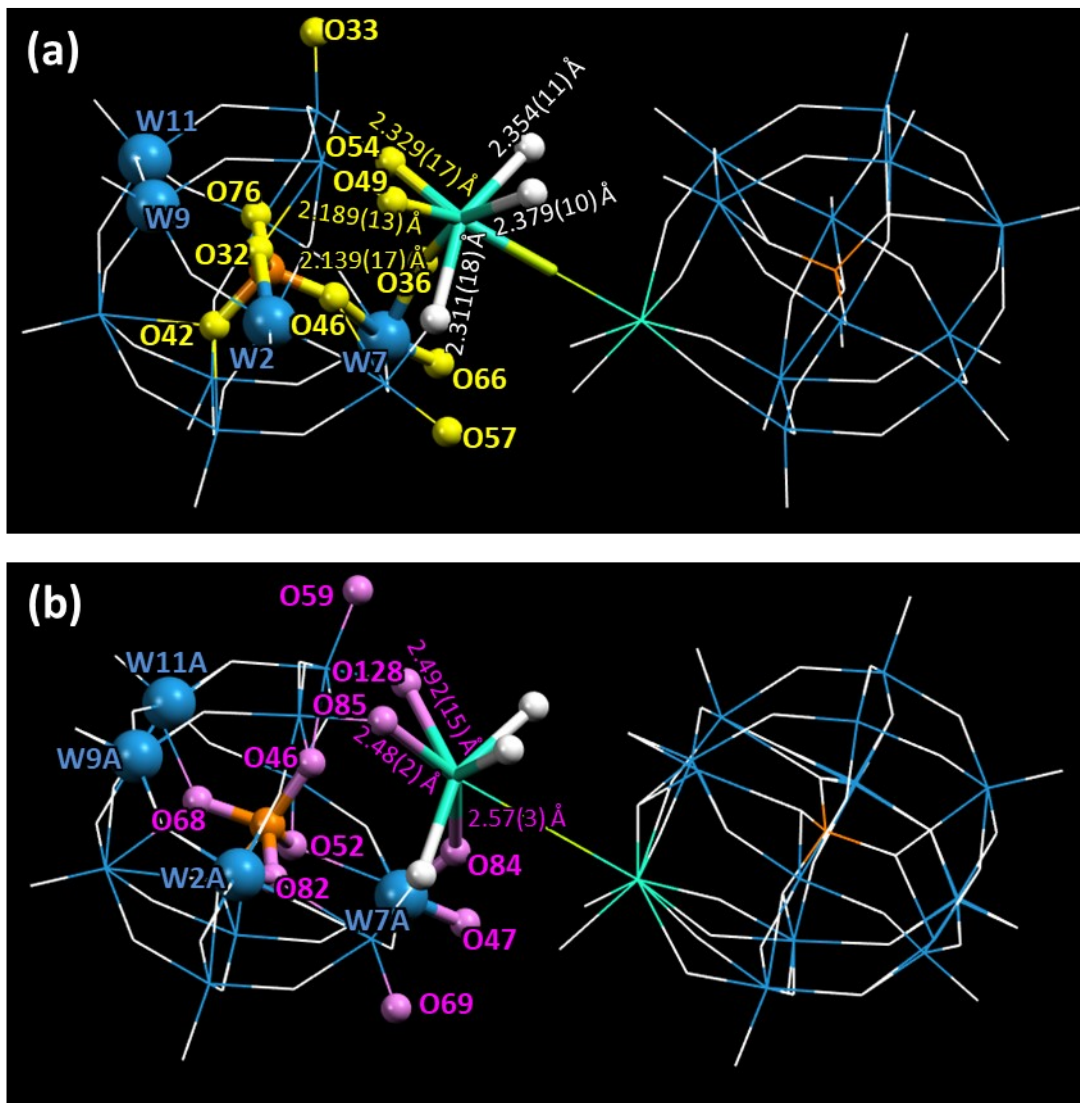

**Figure S2.** Disordered structure of  $\{[(PW_{11}O_{39})Dy(H_2O)_2]F\}^{9-}$  anion in crystal **1** at 94 K with atoms which are with occupancies of (a) 0.566(8) and (b) 0.444(8), respectively. Hydrogen atoms are omitted for clarity. Color code is as same as that in Figure 1 except O atoms at disordered sites. Dy-O distances are shown in the figures.

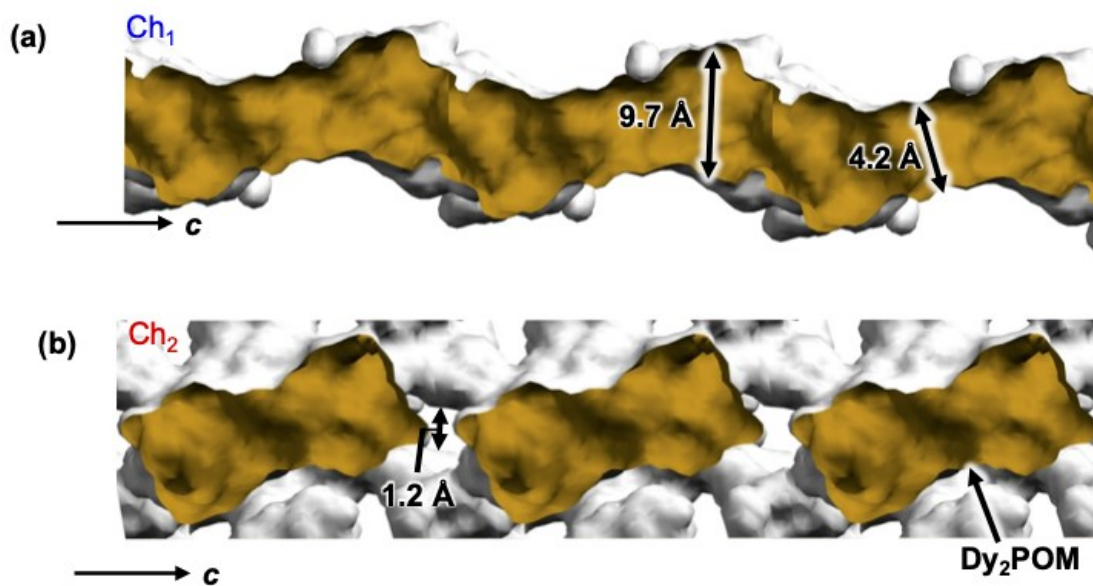

**Figure S3.** One-dimensional channel structures of (a) Ch<sub>1</sub> and (b) Ch<sub>2</sub> along the *c*-axis, displayed using the void function of Mercury software. The inner wall of the channel vacancy is shown in yellow and the outer wall in white. To display the Ch<sub>1</sub> and Ch<sub>2</sub>, uncoordinated crystalline H<sub>2</sub>O molecules and Dy<sub>2</sub>POM are removed from the structure, respectively. The distances shown are the center-to-center distances of the corresponding terminal atoms minus the van der Waals radii.

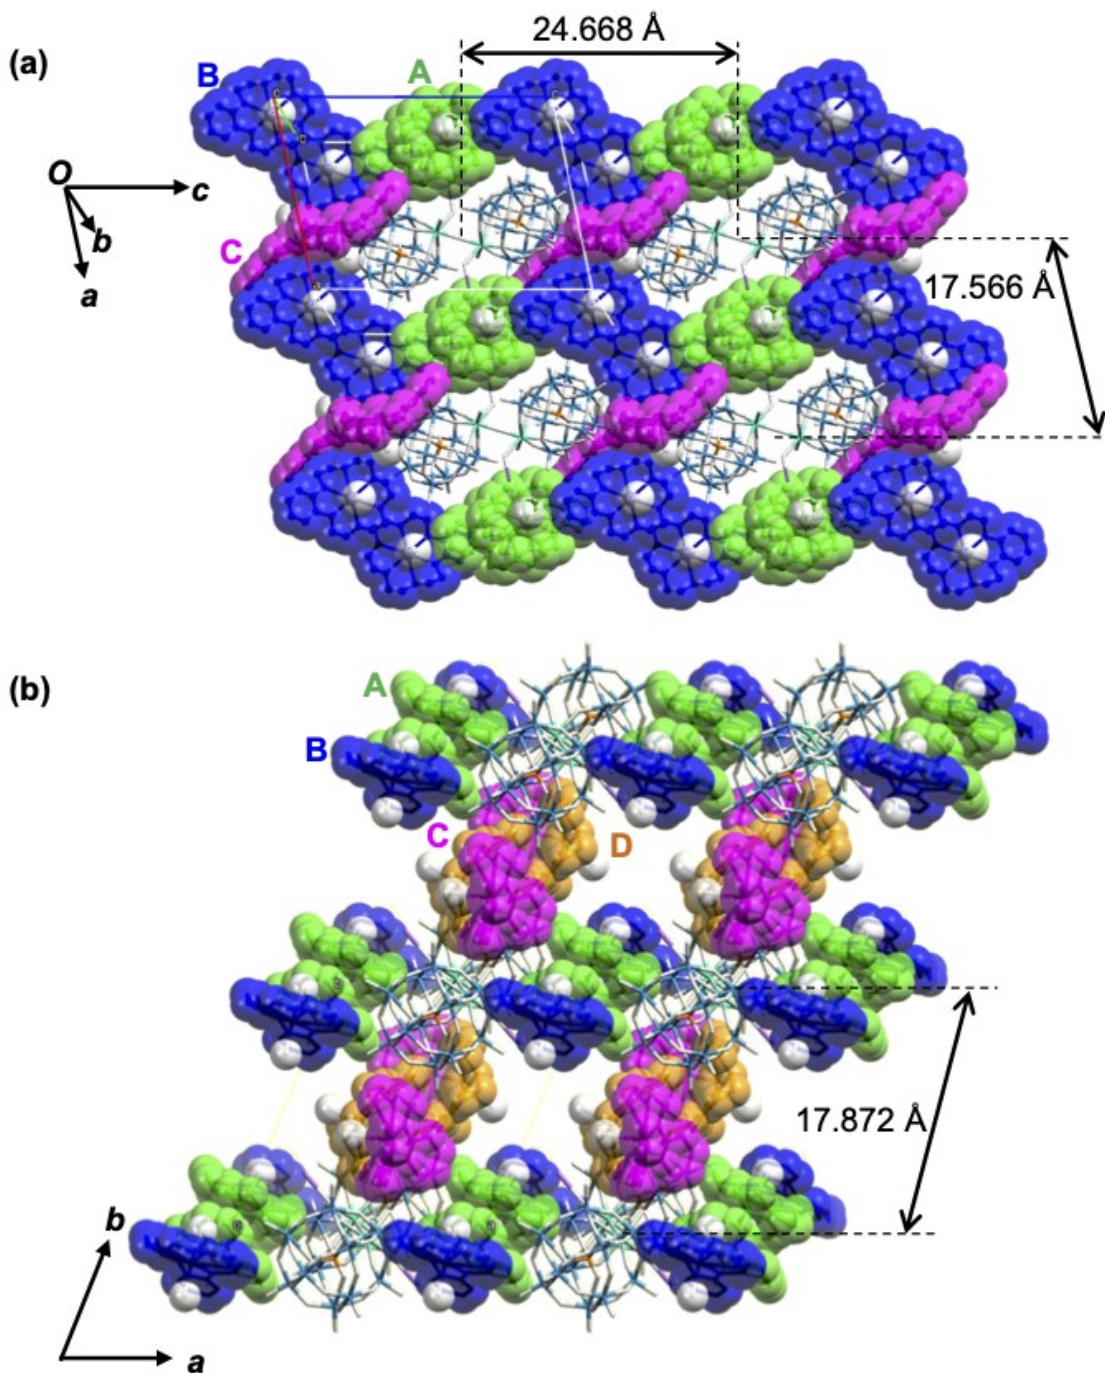

**Figure S4.** Packing structure of crystal 1 viewed along the (a) *b* and (b) *c* axes. The central F<sup>-</sup> distances between adjacent Dy<sub>2</sub>POMs are given in the figure.

## §1. X-ray photoelectron spectroscopy

X-ray photoelectron spectroscopy (XPS) data were collected on a JPS-9200 X-ray photoelectron spectrometer, using monochromatic Al  $K\alpha$  radiations ( $h\nu = 1486.6$  eV).

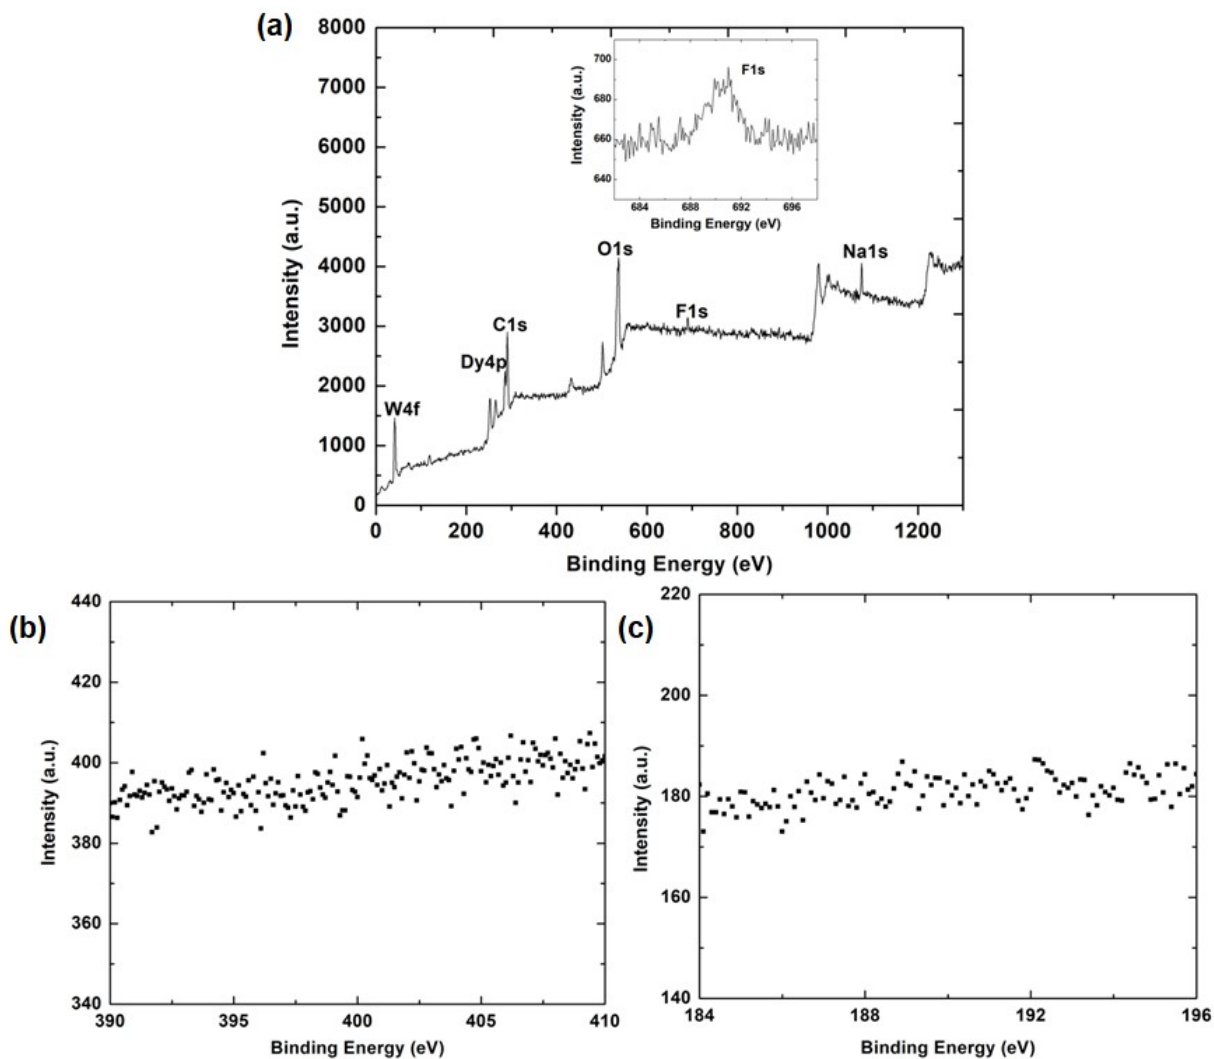

**Figure S5.** XPS spectra of crystal 1. (a) survey scan, Inset: the core level spectrum of F 1s, (b) the core level scan for N 1s, (c) the core level scan for B 1s.

§2. Scanning electron microscopy (SEM) and energy dispersive X-ray spectroscopy (EDS)

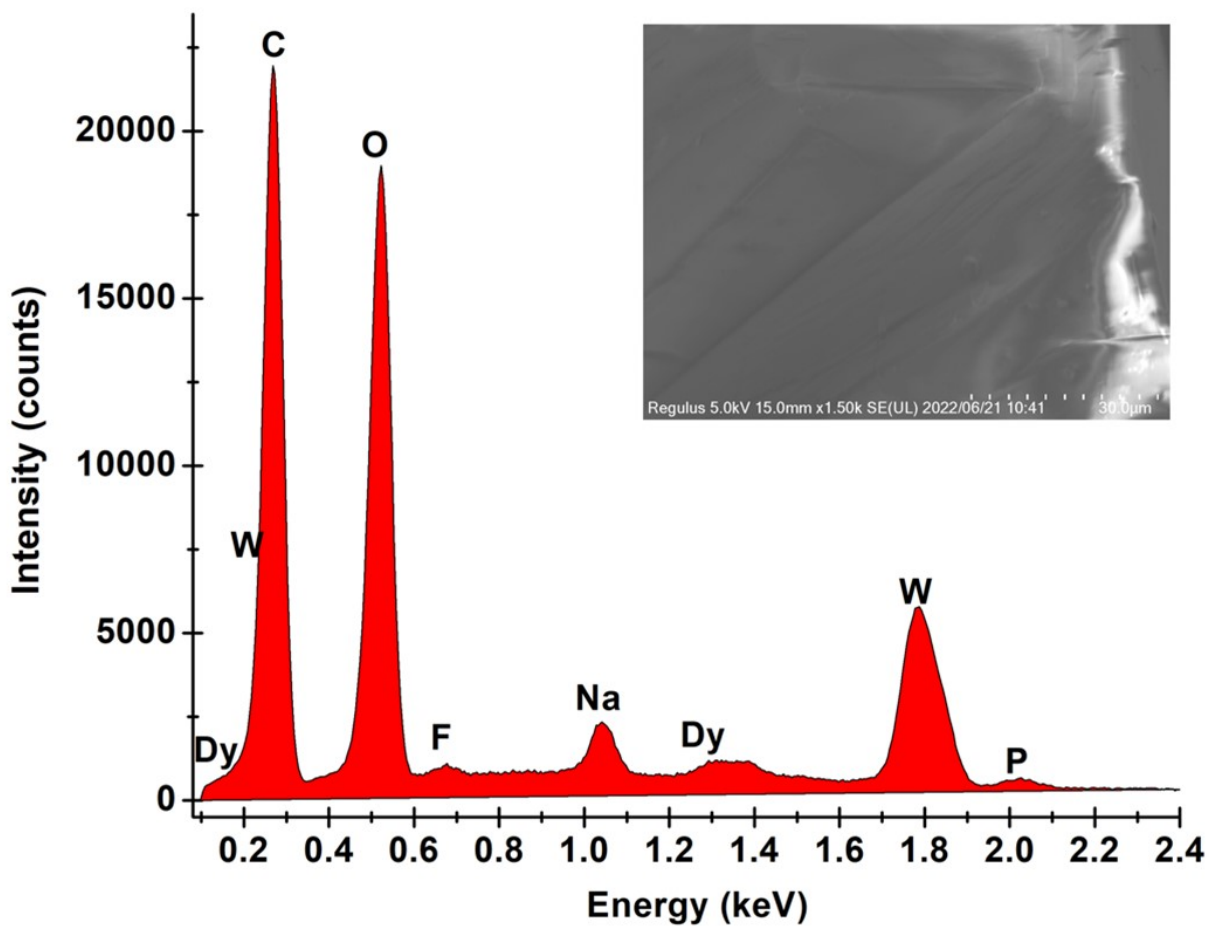

Figure S6. The EDS spectrum of crystal 1. Inset left: magnified SEM image of view of crystal 1.



**Table S2.** Elemental composition results of crystal 1.

| Element | Mass (%) | Mass Norm. (%) | Atom (%) | abs. error (%)<br>(1 sigma) |
|---------|----------|----------------|----------|-----------------------------|
| C       | 17.92    | 24.87          | 49.24    | 1.98                        |
| O       | 21.19    | 28.02          | 41.65    | 2.22                        |
| F       | 0.27     | 0.38           | 0.48     | 0.07                        |
| Na      | 1.71     | 2.37           | 2.46     | 0.12                        |
| P       | 0.46     | 0.63           | 0.49     | 0.05                        |
| W       | 30.20    | 41.92          | 5.42     | 1.43                        |
| Dy      | 1.30     | 1.80           | 0.26     | 0.10                        |
|         | 96.20    | 100.00         | 100.00   |                             |

When the acceleration voltage is fixed, it is generally difficult to quantify atoms that are far apart in atomic number, because the electron diffusion region becomes smaller as the atomic number increases. Therefore, only F, Na, and P with close atomic numbers were compared. Conductive carbon tape was used to fix the sample, therefore the comparison of carbon and oxygen contents are not applied.<sup>S1</sup>

### §3. Thermogravimetric Analyses (TGA)

The amount of H<sub>2</sub>O in the crystals is difficult to determine accurately because the TGA curve includes desorption of other molecules. Since the desorption curve is nearly linear from 100 to 180 °C, it is assumed that desorption of water molecules ends at 180 °C. The weight loss of 5.2 wt% at 180 °C corresponds to about 28 molecules of H<sub>2</sub>O per crystal composition.

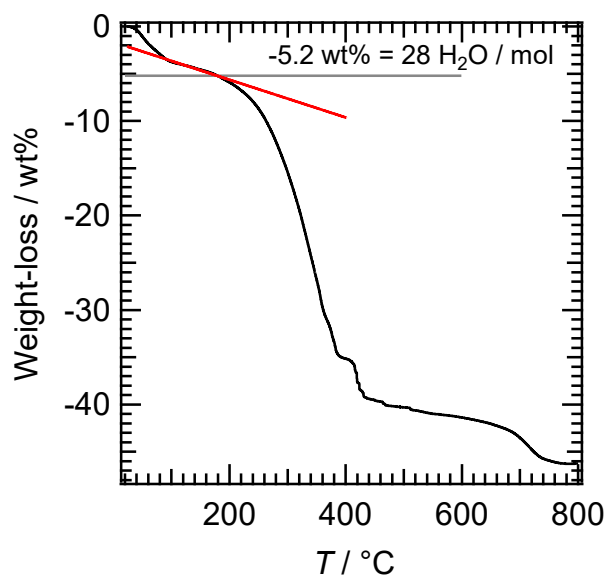

**Figure S7.** Thermogravimetric analysis of crystal 1.

## §5. Infrared Spectroscopy

The IR spectrum of crystal **1** is shown in the Figure S8. The band of  $3645\text{ cm}^{-1}$  is attributed to the stretch of O-H bond. The band near  $1118\text{ cm}^{-1}$  implied the C–O–C asymmetric stretching vibration of B[18]crown-6 molecule. Characteristic bands around  $1594$ ,  $1503$  and  $1450\text{ cm}^{-1}$  are assigned to benzene ring stretch of B[18]crown-6 molecule. As for the bands at  $700$ – $1000\text{ cm}^{-1}$ , that is caused by the asymmetric stretch of the  $\text{W–O}_c\text{–W}$  ( $700$ – $780\text{ cm}^{-1}$ ) and  $\text{W–O}_b\text{–W}$  ( $880$ – $910\text{ cm}^{-1}$ ) bridges and of the  $\text{W–O}_d$  terminal bonds at around  $940\text{ cm}^{-1}$  ( $\text{O}_d$  is a terminal oxygen,  $\text{O}_b$  is a bridging oxygen between corner-sharing octahedra, and  $\text{O}_c$  is a bridging oxygen between edge-sharing octahedra). A pair of characteristic bands at  $1038$  and  $1070\text{ cm}^{-1}$  corresponding to the  $\nu_3$  vibrational mode of  $\text{PO}_4$  of A-type trivacant Keggin unit implies that the loss of local symmetry.<sup>S2–S4</sup>

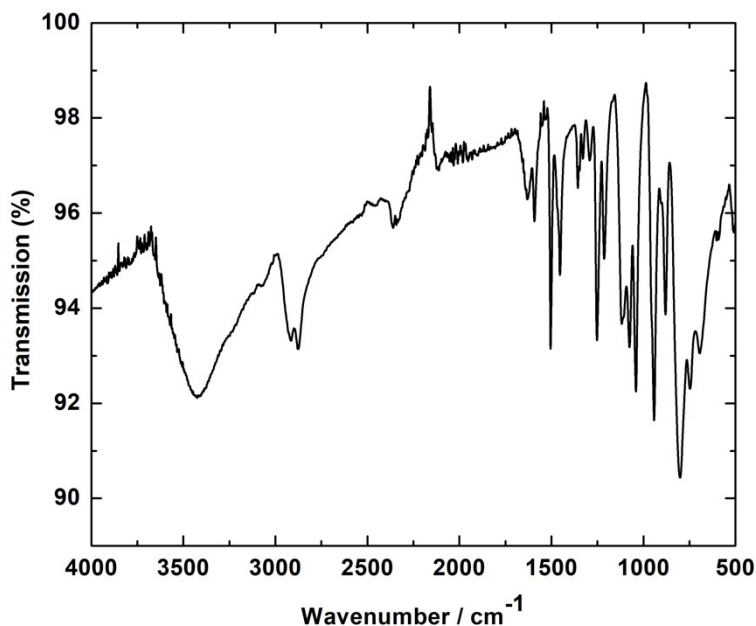

**Figure S8.** infrared spectrum of crystal **1**.

## §6. Magnetic Properties

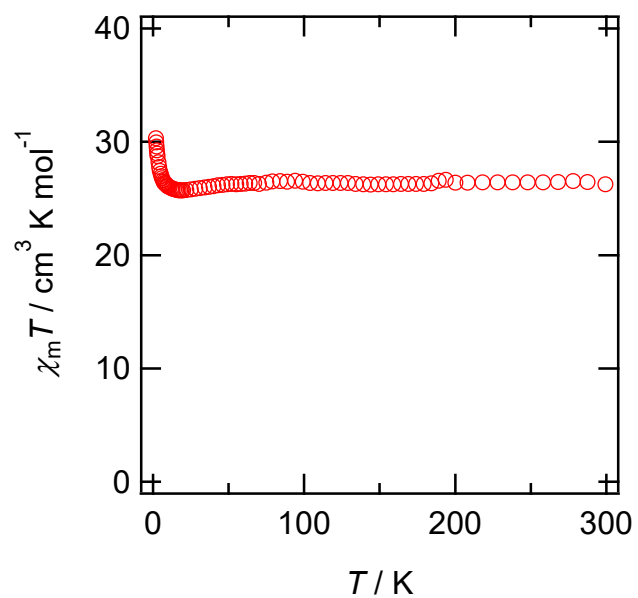

**Figure S9.** Temperature dependence of the product of molar magnetic susceptibility ( $\chi_m$ ) with temperature ( $T$ ) of polycrystalline sample of **1**.

Debye model

$$\chi(\omega) = \chi_S + \frac{\chi_T - \chi_S}{1 + (i\omega\tau)^{1-\alpha}} \quad (\text{S1})^{\text{S5}}$$

(a)

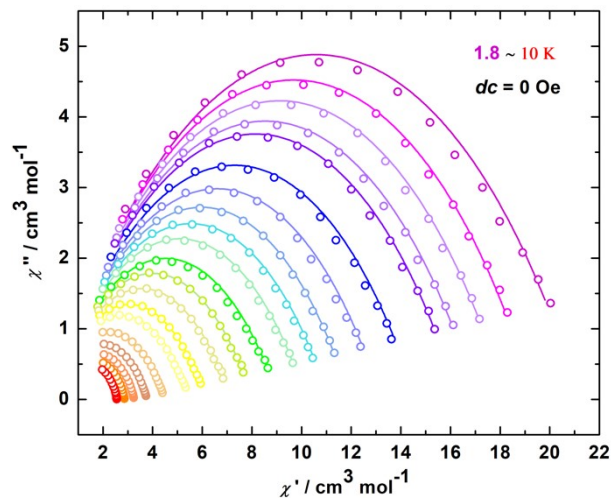

(b)

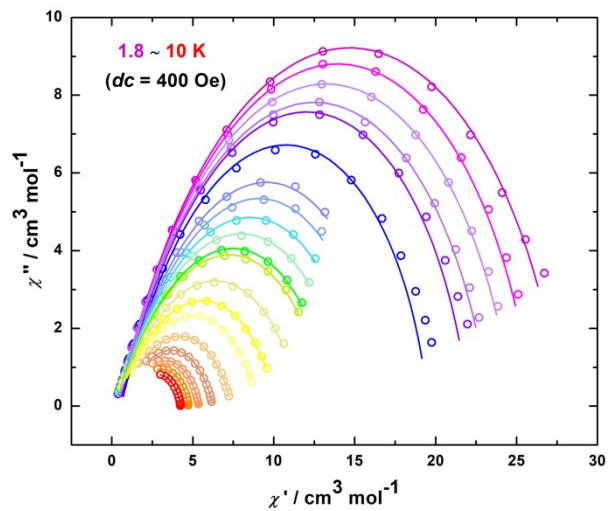

**Figure S10.** Cole–Cole plots for temperatures between 1.8–10 K under a zero (a) and 400 (b)  $dc$  field with the best fit to the single Debye model (Eq.S1) for crystal 1. The Solid lines represent fits to the data.

**Table S3.** The best fitting parameters for Cole–Cole plots of compound **1** at varying temperatures under zero applied dc field.

| $T$ | $\chi_s$   | $\chi_T$   | $\alpha$   |
|-----|------------|------------|------------|
| 1.8 | 0          | 21.192466  | 0.45035163 |
| 1.9 | 0          | 19.3937972 | 0.44446635 |
| 2   | 0          | 18.2442194 | 0.44742188 |
| 2.1 | 0          | 17.0863057 | 0.44985993 |
| 2.2 | 0          | 16.3184765 | 0.45059601 |
| 2.4 | 0          | 14.5864714 | 0.45686191 |
| 2.6 | 0          | 13.1960621 | 0.45946906 |
| 2.8 | 0          | 11.9462859 | 0.45576124 |
| 3   | 0          | 11.0758819 | 0.46236295 |
| 3.2 | 0          | 10.1693286 | 0.46430385 |
| 3.4 | 0          | 9.05940515 | 0.47166921 |
| 3.5 | 0          | 8.02227386 | 0.46693983 |
| 4   | 0          | 7.15589366 | 0.47337803 |
| 4.5 | 0          | 6.13996775 | 0.4739653  |
| 5   | 0          | 5.5714513  | 0.48668961 |
| 6   | 0.03073985 | 4.50138187 | 0.485899   |
| 7   | 0.32027434 | 3.7928435  | 0.46476434 |
| 8   | 0.66946806 | 3.27265807 | 0.42838084 |
| 9   | 0.90865253 | 2.88093638 | 0.38782117 |
| 10  | 1.02671352 | 2.56745008 | 0.34751153 |

**Table S4.** The best fitting parameters for Cole–Cole plots of compound **1** at varying temperatures under 400 Oe applied *dc* field.

| $T$ | $\chi_s$   | $\chi_T$   | $\alpha$   |
|-----|------------|------------|------------|
| 1.8 | 0.47720395 | 28.477204  | 0.2633432  |
| 1.9 | 0.69298358 | 26.1929836 | 0.2337136  |
| 2   | 0.63435157 | 24.9343516 | 0.24015537 |
| 2.1 | 0.61247377 | 23.6124738 | 0.24373576 |
| 2.2 | 0.65285526 | 22.6528553 | 0.23941641 |
| 2.4 | 0.531479   | 20.531479  | 0.257792   |
| 2.6 | 0.44538531 | 18.4453853 | 0.28599004 |
| 2.8 | 0.44244205 | 17.442442  | 0.29620814 |
| 3   | 0.40297562 | 16.4029756 | 0.31354316 |
| 3.2 | 0.41549169 | 15.2154917 | 0.31935654 |
| 3.4 | 0.41065941 | 14.2106594 | 0.33015173 |
| 3.5 | 0.49149924 | 13.4914992 | 0.31846465 |
| 4   | 0.45522819 | 11.9552282 | 0.35379342 |
| 4.5 | 0.5754422  | 10.2754422 | 0.35112705 |
| 5   | 0.63509855 | 9.13509855 | 0.3608778  |
| 6   | 0.90417032 | 7.40417032 | 0.35140942 |
| 7   | 0.81421822 | 6.31421822 | 0.38144872 |
| 8   | 1.1274637  | 5.4274637  | 0.35959779 |
| 9   | 1.37139023 | 4.77139023 | 0.33849239 |
| 10  | 1.61126828 | 4.26126828 | 0.30040819 |

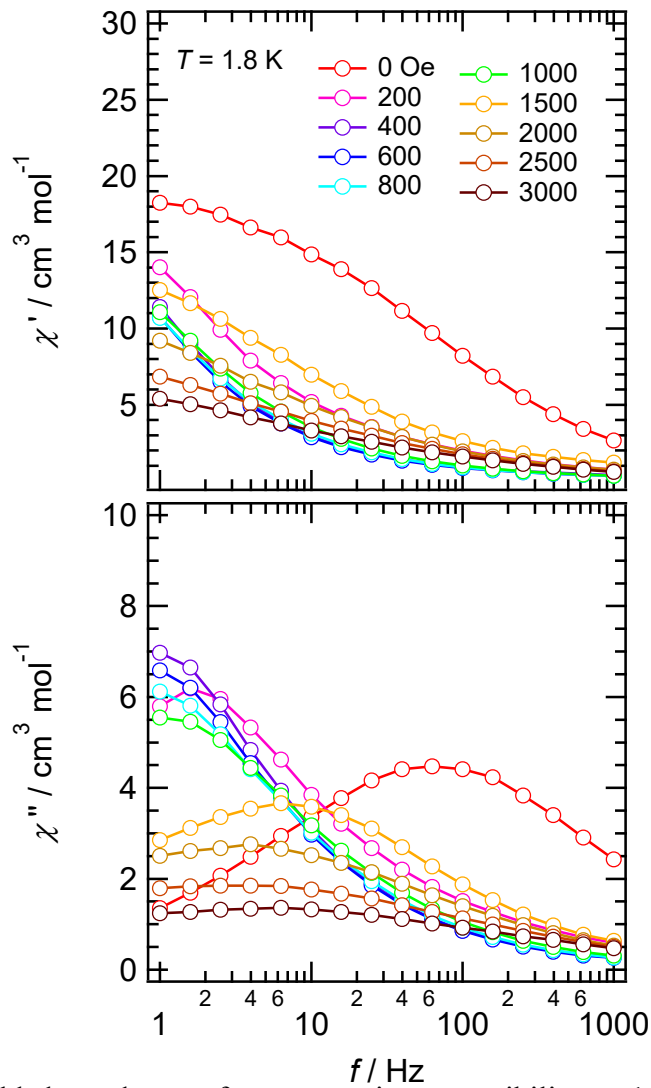

**Figure S11.** Field dependence of ac magnetic susceptibility at 1.8 K under the several direct magnetic fields from 0 to 3000 Oe. Lines are guided for eye.



## References

- S1 M. Abd Mutalib, M. A. Rahman, M. H. D. Othman, A. F. Ismail and J. Jaafar, in *Membrane characterization*, Elsevier, 2017, pp. 161–179.
- S2 R. Khoshnavazi, F. Nicolò, H. A. Rudbari, E. Naseri and A. Aminipour, *Journal of Coordination Chemistry*, 2013, **66**, 1374–1383.
- S3 V. Lahootun, C. Besson, R. Villanneau, F. Villain, L. M. Chamoreau, K. Boubekeur, S. Blanchard, R. Thouvenot and A. Proust, *J Am Chem Soc*, 2007, **129**, 7127–7135.
- S4 T. Chatterjee, M. Sarma and S. K. Das, *Crystal Growth and Design*, 2010, **10**, 3149–3163.
- S5 Y. N. Guo, G. F. Xu, Y. Guo and J. Tang, *Dalton Transactions*, 2011, **40**, 9953–9963.
